# Supplementary material for: Toll-like receptors 2 and 4 differentially regulate the self-renewal and differentiation of spinal cord neural precursor cells
Source: PubMed Central journal article supplement (PMC8935849; doi:10.1186/s13287-022-02798-z), 2022-03-21
Supplement: 13287_2022_2798_MOESM1_ESM.pdf [file 13287_2022_2798_MOESM1_ESM.pdf]

Supplementary Table 1

| GENE                              | FW 5'-3'               | RV 5'-3'                |
|-----------------------------------|------------------------|-------------------------|
| <b>3<math>\beta</math>TUBULIN</b> | TGAAGTCAGCATGAGGGAGA   | GCCTGAATAGGTGTCCAAA     |
| <b>OLIG2</b>                      | ATGGAGAGATGCGTTCG TTC  | CCAGACAGGGAGTCAATCTTT   |
| <b>OLIG1</b>                      | CCCACCTGTTTAGAGCCAGA   | AAGCATGCCAGGAAACCAAG    |
| <b>GFAP</b>                       | AAGGTTGAATCGCTGGAGG    | AGTCGTTAGCTTCGTGCTTG    |
| <b>NOTCH1</b>                     | GAAAGAGGGCATCAGAGGGT   | CTTCGCACCTCCCTCCATT     |
| <b>NCAM1</b>                      | CCGGTTCATAGTCCTGTCCA   | CATTCACGATGCTCTGTCTGG   |
| <b>SOX2</b>                       | TTACCTCTTCCTCCCACTCCA  | CCCTCCAATTCCCTTGAT      |
| <b>SOX9</b>                       | CAAGAACAAGCCACACGTCA   | GTGGTCTTTCTTGTGCTGCA    |
| <b>SOX10</b>                      | TGGGCAAGGTCAAGAAGGAA   | TTGTGGAGGTGAGGGTACTG    |
| <b>C-MYC</b>                      | TGAAGAACCAGAGAAGCCCA   | CCTATTCAGCACGCTTCTCC    |
| <b>NG2</b>                        | ACAGCTCCTGCCTCCTTCTTC  | TCAACAGACAGCACAGCCCAG   |
| <b>TLR1</b>                       | ATGATTCTGCCTGGGTGAAG   | TCTGGATGAAGTGGGGAGAC    |
| <b>TLR2</b>                       | CTCCCACTTCAGGCTCTTTG   | AGGAACTGGGTGGAGAACCT    |
| <b>TLR3</b>                       | AGCTTTGCTGGGAACTTTCA   | GAAAGATCGAGCTGGGTGAG    |
| <b>TLR4</b>                       | AAGAGCCGGAAGGTTATTGTG  | CCCATTCCAGGTAGGTGTTTC   |
| <b>TLR6</b>                       | ACACAATCGGTTGCAAAACA   | GGAAAGTCAGCTTCGTCAGG    |
| <b>TLR8</b>                       | GGCACAACCTCCCTTGTGATT  | CATTTGGGTGCTGTTGTTTG    |
| <b>TLR9</b>                       | GCTTTGGCCTTTCACTCTTG   | AACTGCGCTCTGTGCCTTAT    |
| <b>PPIA</b>                       | CGCGTCTCCTTCGAGCTGTTT  | TGTAAAGTCACCACCCTGGCACA |
| <b>DLX2</b>                       | TGGGCTCCTACCAGTACCAC   | TGGCTTCCCGTTCACTATTC    |
| <b>PDGFR<math>\alpha</math></b>   | ACGTTCAAGACCAGCGCGAGTT | GCAGCACATTCATACTCTCCA   |
| <b>NEUROG1</b>                    | GACAGACGGACAGGAGGTTT   | ACATCACTCAGGAGACCAGC    |
| <b>P21</b>                        | GCCTTAGCCCTCACTCTGTG   | AGGGCCCTACCGTCCTACT     |
| <b>CYCLIN D1</b>                  | AGTGC GTGCAGAAGGAGATT  | CACAACTTCTCGGCAGTCAA    |
| <b>FOXJ1</b>                      | TTGACTGGGAGGCCATCTTT   | AGGAAGGATGTGGCCAAGAA    |
